# Supplementary material for: Genomic Diversity among Actinomyces naeslundii Strains and Closely Related Species
Source: MDPI journal article supplement (doi:10.3390/microorganisms11020254), 2023-01-19
Supplement: s1 [file s1]

Supplementary Table S1.1

| Strain ID                            | Origin               | Source                                         | Sequence Types | Sub-Cluster (Core-Genome_ | GenBank Accession numbers |
|--------------------------------------|----------------------|------------------------------------------------|----------------|---------------------------|---------------------------|
| <b><i>Actinomyces naeslundii</i></b> |                      |                                                |                |                           |                           |
| CCUG 35334                           | Blood (Endocarditis) | University of Goteborg, Sweden (TF11)          | 100            | AN                        | SAMN05898698              |
| G127B                                | Plaque (Caries -)    | KCL                                            | 88             | AN                        | SAMN05898699              |
| MB-1                                 | Plaque (Caries +)    | KCL                                            | 97             | AN                        | SAMN05898700              |
| NCTC 10301                           | Plaque               | Stromberg                                      | 77             | AN                        | SAMN05898701              |
| R24330                               | IUCD                 | Cardiff                                        | 72             | AN                        | SAMN05898702              |
| S43L                                 | Plaque (Caries -)    | KCL                                            | 96             | AN                        | SAMN05898703              |
| S44D                                 | Plaue (Caries -)     | KCL                                            | 74             | AN                        | SAMN05898704              |
| S65A                                 | Plaque (Caries -)    | KCL                                            | 78             | AN                        | SAMN05898705              |
| T23P-1                               | Plaque (Caries -)    | KCL                                            | 92             | AN                        | SAMN05898706              |
| CCUG 37599                           | Cerebrospinal fluid  | R709-03041/97 (University of Goteborg, Sweden) | 83             | AN_1                      | SAMN05898707              |
| F6E1                                 | Plaque (Caries -)    | KCL                                            | 84             | AN_1                      | SAMN05898708              |
| Pn6N                                 | Plaque               | Stromberg                                      | 99             | AN_1                      | SAMN05898709              |
| MMRC12-1                             | Soft lesion          | KCL                                            | 93             | AN_1                      | SAMN05898710              |
| F12B1                                | Plaque (Caries +)    | KCL                                            | 79             | AN_2                      | SAMN05898711              |
| R8152                                | IUCD                 | Cardiff                                        | 82             | AN_2                      | SAMN05898712              |
| R13240                               | Subphrenic abscess   | Cardiff                                        | 98             | AN_2                      | SAMN05898713              |
| R19039                               | Liver abscess        | Cardiff                                        | 80             | AN_2                      | SAMN05898714              |
| W8-2-3                               | Plaque (Caries +)    | KCL                                            | 94             | AN_2                      | SAMN05898715              |
| WE6B-3                               | Plaque (Caries +)    | KCL                                            | 95             | AN_2                      | SAMN05898716              |
|                                      |                      |                                                |                |                           |                           |

| <b><i>Actinomyces oris</i></b> |                   |             |           |             |                 |
|--------------------------------|-------------------|-------------|-----------|-------------|-----------------|
| G53E                           | Plaque (caries -) | KCL         | 35        | AO          | SAMN05898717    |
| <b>OT175</b>                   |                   |             |           | <b>AO</b>   | <b>SEQ1848</b>  |
| W11-1-1                        | Plaque (Caries +) | KCL         | 41        | AO          | SAMN05898718    |
| F4D1                           | Plaque (Caries -) | KCL         | 23        | AO          | SAMN05898719    |
| R23275                         | Blood Culture     | Cardiff     | 63        | AO          | SAMN05898720    |
| A7A-1                          | Leathery lesion   | KCL         | 14        | AO          | SAMN05898721    |
| <b>C505</b>                    |                   |             |           | <b>AO</b>   |                 |
| <b>MG1</b>                     |                   |             | <b>68</b> | <b>AO</b>   | <b>SEQF1063</b> |
| <b>K20 (MT 500 seq)</b>        |                   |             |           | <b>AO</b>   | <b>SEQF2431</b> |
| WE8B-23                        | Plaque (Caries +) | KCL         | 56        | Independent | SAMN05898722    |
| R11372                         | IUCD              | Cardiff     | 61        | AO_1        | SAMN05898723    |
| A19A-1                         | Leathery lesion   | KCL         | 3         | AO_1        | SAMN05898724    |
| CCUG 34286                     | Gingival crevice  | VPI-D163E-3 | 67        | AO_1        | SAMN05898725    |
| F28B1                          | Plaque (Caries +) | KCL         | 54        | AO_2        | SAMN05898726    |
| M48-1B-1                       | Plaque (Caries +) | KCL         | 55        | AO_2        | SAMN05898727    |
| MMRCO6-1                       | Soft lesion       | KCL         | 53        | AO_2        | SAMN05898728    |
| P6N                            | Plaque            | Stromberg   | 64        | Independent | SAMN05898729    |
| CCUG 33920                     | Plaque            | P11N        | 66        | Independent | SAMN05898730    |
| <b>OT171 (MT 500 seq)</b>      |                   |             |           |             | <b>SEQF1693</b> |
| S24V                           | Plaque (Caries -) | KCL         | 43        | AO_3        | SAMN05898731    |
| R21091                         | Cerebral abscess  | Cardiff     | 44        | AO_3        | SAMN05898732    |
| S64C                           | Plaque (Caries -) | KCL         | 51        | AO_3        | SAMN05898733    |
| <b>OT170</b>                   |                   |             |           |             | <b>SEQF1849</b> |
| <b><i>A. johnsonii</i></b>     |                   |             |           |             | <b>SEQF1668</b> |
| <b><i>A. odontolyticus</i></b> |                   |             |           |             | <b>SEQF1388</b> |

**KCL: King's College London**

**Sequence Types:** were determined in a study by [Henssge, Do *et al.*, 2011]

**Sub Clusters:** Determined by current study using whole genome Analysis

\*The strains in bold letters are the ones which were included in the current study from publically available database.
